# Supplementary material
Source: PubMed Central journal article supplement (PMC9201872)
Supplement: NIHMS1796888-supplement-1.pdf [file NIHMS1796888-supplement-1.pdf]

# **Mechanistic insight into light-dependent recognition of Timeless by *Drosophila* Cryptochrome**

Changfan Lin<sup>1,3</sup>, Connor M. Schneps<sup>1</sup>, Siddarth Chandrasekaran<sup>1</sup>, Abir Ganguly<sup>2</sup>, and Brian R. Crane<sup>1\*</sup>

<sup>1</sup> Department of Chemistry and Chemical Biology, Cornell University, Ithaca, NY 14853 USA

<sup>2</sup> Institute for Quantitative Biomedicine, Rutgers University, Piscataway, NJ 08854 USA

<sup>3</sup> Current Address: Division of Biology and Biological Engineering, California Institute of Technology, Pasadena, CA 91125

## Contents

|                                                                                                                                     |    |
|-------------------------------------------------------------------------------------------------------------------------------------|----|
| Index for Supplemental Information.....                                                                                             | 2  |
| Figure S1: Domain maps for CRY and TIM fusion proteins.....                                                                         | 3  |
| Table S1: Primer sequences for Q5 polymerase-based mutagenesis and DNA construct sequences.....                                     | 4  |
| Figure S2: CRY $\Delta$ binds TIM in 1:1 molar ratio.....                                                                           | 10 |
| Figure S3: Multiplex imaging of TIM and CRY bands.....                                                                              | 11 |
| Figure S4: UV-Vis and cw-ESR Spectra of H377A and H378A variants.....                                                               | 12 |
| Figure S5: Field swept echoes, primary DEER traces, background subtractions, and corrected signals of H377A and H378A variants..... | 13 |
| Figure S6: Gaussian function fitting (DD) to the time domain traces.....                                                            | 14 |
| Table S2: Detailed Restrained DD fitting statistics.....                                                                            | 15 |
| Table S3: Percent undocked for Ala variants using linear combination fit.....                                                       | 15 |
| Figure S7: SVD and time domains and distance distributions.....                                                                     | 16 |
| Figure S8: DEER data and fitting statistics for H377L,EN.....                                                                       | 17 |
| Table S4: Gibson Assembly master mix.....                                                                                           | 18 |

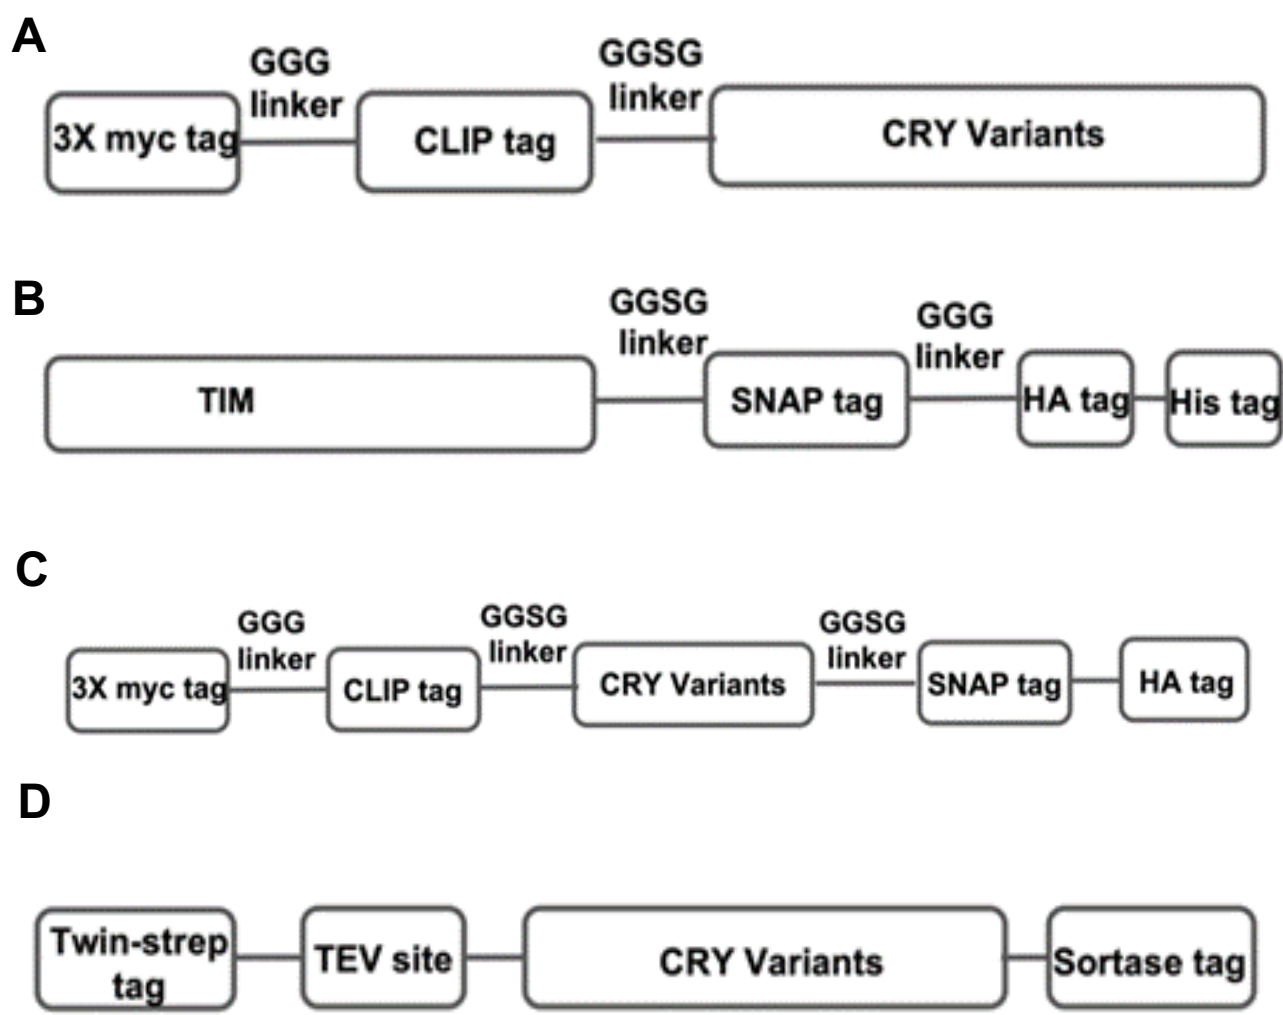

**Figure S1:** Domain maps of fusions proteins used in this study, Related to Figures 1-4. (A) CLIP-CRY (in pAC5.1), (B) TIM-SNAP-HA (in pAC5.1), CLIP-CRY-SNAP (in pAC5.1) and (D) CRY with sortase tag (in pET28a(+)) fusion proteins made for this study.

**Table S1** Primer sequences for Q5 polymerase-based mutagenesis and DNA construct sequences, Related to Figure 1.

| Primer name                       | Sequences                                                                                                                                                                                                                                                                                                                                                                                                                                                                                                                                                                                                                                                                                                      |
|-----------------------------------|----------------------------------------------------------------------------------------------------------------------------------------------------------------------------------------------------------------------------------------------------------------------------------------------------------------------------------------------------------------------------------------------------------------------------------------------------------------------------------------------------------------------------------------------------------------------------------------------------------------------------------------------------------------------------------------------------------------|
| H378A-Forward                     | ATGGCTCCACgccACGCTGCGCAAC                                                                                                                                                                                                                                                                                                                                                                                                                                                                                                                                                                                                                                                                                      |
| H378K-Forward                     | ATGGCTCCACaagACGCTGCGCAAC                                                                                                                                                                                                                                                                                                                                                                                                                                                                                                                                                                                                                                                                                      |
| H378R-Forward                     | ATGGCTCCACcgcACGCTGCGCAAC                                                                                                                                                                                                                                                                                                                                                                                                                                                                                                                                                                                                                                                                                      |
| H378N-Reverse                     | ATGGCTCCACaacACGCTGCGCAAC                                                                                                                                                                                                                                                                                                                                                                                                                                                                                                                                                                                                                                                                                      |
| H378Q-Forward                     | ATGGCTCCACcagACGCTGCGCAAC                                                                                                                                                                                                                                                                                                                                                                                                                                                                                                                                                                                                                                                                                      |
| H378L-Reverse                     | ATGGCTCCACctgACGCTGCGCAAC                                                                                                                                                                                                                                                                                                                                                                                                                                                                                                                                                                                                                                                                                      |
| H378F-Forward                     | ATGGCTCCACttcACGCTGCGCAAC                                                                                                                                                                                                                                                                                                                                                                                                                                                                                                                                                                                                                                                                                      |
| H378-Reverse                      | CCCTCGGCCAGGAGTTGT                                                                                                                                                                                                                                                                                                                                                                                                                                                                                                                                                                                                                                                                                             |
| H377A/H378A-Forward               | GGGATGGCTCgctgccACGCTGCGCAACACCG                                                                                                                                                                                                                                                                                                                                                                                                                                                                                                                                                                                                                                                                               |
| H377A/H378A-Reverse               | TCGGCCAGGAGTTGTTCGC                                                                                                                                                                                                                                                                                                                                                                                                                                                                                                                                                                                                                                                                                            |
| H377A-Forward                     | GGGATGGCTCgctCATACGCTGCGCAAC                                                                                                                                                                                                                                                                                                                                                                                                                                                                                                                                                                                                                                                                                   |
| H377L-Forward                     | GGGATGGCTCctgCATACGCTGCG                                                                                                                                                                                                                                                                                                                                                                                                                                                                                                                                                                                                                                                                                       |
| H377-Reverse                      | TCGGCCAGGAGTTGTTCGC                                                                                                                                                                                                                                                                                                                                                                                                                                                                                                                                                                                                                                                                                            |
| Kozak sequence                    | AAAAATGG                                                                                                                                                                                                                                                                                                                                                                                                                                                                                                                                                                                                                                                                                                       |
| 3x myc- CLIP-CRY in pAC5.1 vector | ATGGAGCAGAAGCTGATCTCAGAGGAGGACCTGGGAGGAGGAGAACA<br>ATTAATAAGTGAAGAAGACCTGGGCGGCGGAGCAGAAGCTGATCTCAG<br>AGGAGGACCTGGGAGGAGGAATGGACAAAGACTGCGAAATGAAGCGCACC<br>ACCCTGGATAGCCCTCTGGGCAAGCTGGAACGTCTGGGTGCGAACAGGG<br>CCTGCACCGTATCATCTTCTGGGCAAAGGAACATCTGCCGCCGACGCCG<br>TGGAAGTGCCTGCCCCAGCCGCGGTGCTGGGCGGACCAGAGCCACTGATC<br>CAGGCCACCGCCTGGCTCAACGCCTACTTTCACCAGCCTGAGGCCATCGA<br>GGAGTTCCCTGTGCCAGCCCTGCACCACCCAGTGTTCAGCAGGAGAGCT<br>TTACCCGCCAGGTGCTGTGAAACTGCTGAAAGTGGTGAAGTTCGGAGAG<br>GTCATCAGCGAGAGCCACCTGGCCGCCCTGGTGGGCAATCCCGCCGCCAC<br>CGCCGCCGTGAACACCGCCCTGGACGGAAATCCCGTGCCATTCTGATCC<br>CCTGCCACCGGTGGTGCAGGGCGACAGCGACGTGGGGCCCTACCTGGGG<br>GGGCTCGCCGTGAAAGAGTGGCTGCTGGCCACGAGGGCCACAGACTGGG |

|                                                |                                                                                                                                                                                                                                                                                                                                                                                                                                                                                                                                                                                                                                                                                                                                                                                                                                                                                                                                                                                                                                                                                                                                                                                                                                                                                                                                                                                                                                                                                                                                                                                                                                                                                                                                                                                                                                                                                                                       |
|------------------------------------------------|-----------------------------------------------------------------------------------------------------------------------------------------------------------------------------------------------------------------------------------------------------------------------------------------------------------------------------------------------------------------------------------------------------------------------------------------------------------------------------------------------------------------------------------------------------------------------------------------------------------------------------------------------------------------------------------------------------------------------------------------------------------------------------------------------------------------------------------------------------------------------------------------------------------------------------------------------------------------------------------------------------------------------------------------------------------------------------------------------------------------------------------------------------------------------------------------------------------------------------------------------------------------------------------------------------------------------------------------------------------------------------------------------------------------------------------------------------------------------------------------------------------------------------------------------------------------------------------------------------------------------------------------------------------------------------------------------------------------------------------------------------------------------------------------------------------------------------------------------------------------------------------------------------------------------|
|                                                | <p>CAAGCCTGGGCTGGGTGGTGGCTCAGGAATGGCCACGCGAGGGGCGAATG<br/> TGATTTGGTTTCGCCATGGATTGCGCCTCCATGATAATCCCGCTCTATTG<br/> GCCGCCCTCGCCGATAAGGATCAGGGTATAGCCCTAATTCCCGTTTTTCAT<br/> ATTCGATGGAGAGAGTGCAGGTACCAAGAATGTGGGTTACAATCGGATGC<br/> GTTTCCTCCTGGACTCGTTGCAGGACATCGATGATCAGCTACAGGCGGCA<br/> ACTGATGGACGTGGACGCCTCCTGGTCTTCGAGGGCGAACC GGCTTATAT<br/> CTTCCGCCGGCTACATGAGCAAGTGCCTGTCACAGGATTTGCATAGAGC<br/> AGGACTGCGAGCCAATTTGGAATGAGCGCGATGAAAGCATCCGTTCTCTA<br/> TGTCGGGAGCTGAATATCGACTTTGTGCGAGAAGGTATCACACACGTTTG<br/> GGATCCGCAATTGGTGATTGAGACCAATGGTGGCATTCCACCGCTGACCT<br/> ACCAAATGTTCTGCACACGGTGCAAATTATTGGGCTTCCACCGCGTCCC<br/> ACCGCCGATGCTCGACTAGAAGACGCCACCTTTGTGCGAGCTGGACCCCGA<br/> GTTCTGCCGAAGTCTTAAGTTGTTGAGCAGCTGCCACGCCGGAGCACT<br/> TCAATGTGTATGGAGACAACATGGGCTTCTGGCCAAGATTAAGTGGCGC<br/> GGCGGAGAAACACAGGCCTTACTTCTGTTGGATGAGCGTCTTAAAGTGA<br/> GCAGCATGCGTTTTGAGCGTGGATTTTATCTGCCCAACCAGGCACTGCCCA<br/> ATATCCACGACTCGCCAAAATCGATGAGCGCCCATCTGCGTTTTGGTTGC<br/> CTTTCGGTACGTCGCTTCTACTGGAGCGTCCACGATCTCTTCAAGAATGT<br/> CCAGTTGCGCGCCTGTGTGCGGGGCGTTCAGATGACTGGCGGCGCGCACA<br/> TCACGGGACAGTTGATCTGGCGAGAGTACTTCTACACCATGTCGGTGAAC<br/> AATCCAAACTACGATCGCATGGAGGGCAATGACATCTGCCTGAGCATCCC<br/> GTGGGCTAAGCCGAACGAAAATCTCCTGCAGAGCTGGCGTTTAGGCCAAA<br/> CGGGATTCCCGCTCATCGACGGCGCCATGCGACAACCTCCTGGCCGAGGGA<br/> TGGCTCCACCATAACGCTGCGCAACACCGTGGCCACCTTTCTCACGCGCGG<br/> CGGTTTGTGGCAGAGCTGGGAGCATGGACTGCAGCACTTTCTGAAGTATC<br/> TGCTGGATGCGGATTGGTTCGGTCTGCGCTGGCAACTGGATGTGGGTATCC<br/> AGCTCGGCGTTTGAAAGGCTGCTGGACTCCTCCCTGGTACCTGCCCGGT<br/> GGCATTGGCCAAGCGACTTGATCCGGATGGCACCTACATCAAGCAGTACG<br/> TCCCGGAGTTGATGAATGTGCCAAGGAATTTGTTACAGAGCCCTGGCGA<br/> ATGTCTGCCGAGCAGCAGGAGCAGTACGAGTGCCTGATCGGAGTCCATTA<br/> TCCGGAGCGGATCATTGATTTGTCCATGGCCGTAAAGCGAAACATGCTGG<br/> CCATGAAGTCTCTCCGAAATTTCGCTGATCACCCCGCCCGCATTGCCGA<br/> CCATCCAACGAGGAGGAAGTGCCTCAGTTCTTCTGGCTGGCCGACTAA</p> |
| <p>TIM-SNAP-<br/> HA in pAC5.1<br/> vector</p> | <p>ATGGACTGGTTACTAGCAACTCCGCAGTTGTACAGCGCGTTCTCCTCCTT<br/> GGGTTGCTTGGAGGGCGATAACCTATGTGGTCAACCCGAATGCATTGGCCA<br/> TTCTGGAGGAGATCAACTACAAGCTCACCTATGAGGACCAAACACTGCGC<br/> ACCTTTCGACGGGCCATTGGATTTGGCCAGAATGTGAGGTCAGACCTGAT<br/> ACCGCTGCTGGAGAATGCCAAGGATGATGCGGTCTGGAGTCGGTCATCC<br/> GGATACTCGTCAATCTGACGGTGCCGGTGGAGTGCCTCTTCTCCGTGGAC<br/> GTGATGTACCGCACGGATGTGGGTCGCCACACCATCTTCGAGCTGAATAA<br/> GCTGCTGTACACCAGCAAGGAAGCATTTACCGAGGCCAGGAGACCAAGA<br/> GCGTGGTGGAGTACATGAAACACATACTGGAGTCGGACCCTAAGCTGTGCG<br/> CCGCACAAATGCGATCAAATCAACAATGTCTGCTGCTGCTGAGAAATAT<br/> CCTGCACATTCCAGAGACGCATGCCCATTCGCTGATGCCCATGATGCAGT<br/> CGATGCCGCATGGCATCTCCATGCAGAACACGATCTTGTGGAATCTCTTC<br/> ATCCAGAGCATCGACAAGTTACTCCTGTATCTGATGACCTGTCCGCAGAG<br/> AGCCTTCTGGGGAGTGACCATGGTGCAACTGATTGCTTTGATCTACAAGG<br/> ATCAGCATGTGAGCACTCTGCAAAAATACTTAGCCTCTGGTTTCGAAGCC</p>                                                                                                                                                                                                                                                                                                                                                                                                                                                                                                                                                                                                                                                                                                                                                                                                                                                                                                                                                                                                                                              |

TCTCTGTCGGAGAGCTCTGAGGATAATGAGAGTAATACCTCGCCCCCAA  
ACAGGGCAGTGGCGATTCCAGCCCCATGCTGACCTCTGATCCTACCTCTG  
ATTCTCGGACAATGGCAGCAATGGCCGTGGCATGGGCGGTGGCATGCGG  
GAAGGAACAGCGGCCACTTTGCAGGAGGTCAGCCGCAAGGGTCAGGAGTA  
TCAGAACGCCATGGCCAGAGTGCCAGCGGATAAGCCCGATGGCTCCGAAG  
AGGCCAGCGATATGACGGGGAACGACAGCGAGCAGCCTGGATCGCCGGAG  
CAATCGCAGCCCGCCGGCGAGTCCATGGATGATGGAGATTACGAGGACCA  
GAGACACAGGCAACTGAACGAGCATGGCGAAGAGGATGAAGATGAGGACG  
AAGTGGAGGAGGAAGAGTACCTACAATTGGGCCAGCCTCGGAGCCCCTA  
AACTTAACACAACAACCAGCTGACAAGGTCAACAACACTACCAACCCAAC  
GTCCAGTGCGCCACAAGGCTGCCTGGGCAATGAGCCATTCAAGCCACCAC  
CTCCTCTGCCAGTCAGAGCCTCCACCTCGGCACACGCTCAAATGCAGAAG  
TTCAACGAATCGTCCTACGCGTCCCACGTATCTGCGGTCAAATTGGGCCA  
AAAGTCCCACATGCCGGCCAGCTCCAGCTGACCAAGGGCAAGTGTGTGTC  
CACAGAAGCGGGAATGCCCTCCTCGCAGTCGGAGCTATCGGATTGCGGT  
TATGGCACCCAGGTGGAAAATCAGGAATCCATTTCCACCTCAGCAACGA  
CGATGATGGGCCGCAGGGCAAGCCGCAGCACCAGAAGCCTCCGTGTAACA  
CGAAGCCACGAATAAACCACGGACGATTATGTGCGCAATGGACAAAAG  
GAGCTTAGACGCAAAAACTGGTCAAGCGCAGCAAAGCAGCCTCATCAA  
CATGAAGGGTCTGGTACAGCACACCCCCACCGATGATGACATCTCCAATC  
TGCTGAAGGAATTCACCGTGGATTTCTCCTCAAGGGTTACAGCTATCTG  
GTGGAGGAACTGCACATGCAACTGCTTTCCAATGCGAAGGTGCCCATTGA  
CACATCGCACTTCTTCTGGCTGGTCACCTACTTCTGAAGTTTGCCGCC  
AACTGGAGCTGGATATGGAGCACATCGACACTATTCTCACCTACGATGTT  
TTGAGCTACTTGACCTATGAGGGTGTGTCCCTATGTGAGCAACTGGAAC  
GAATGCCCCGACAGGAGGGCAGTGACCTGAAGCCCTATCTAAGGCGAATGC  
ACTTGGTGGTGACGGCCATCCGGGAGTTCTCCAGGCCATTGATACGTAC  
AACAAAGTGACTCATCTGAACGAGGACGACAAAGCCATTTGAGGCAGCT  
TCAGCTGCAGATTAGCGAAATGTCCGATCTGAGGTGCCTTTTTGTGCTTC  
TGCTGAGGCGTTTCAATCCCAGCATTCATTCCAAGCAGTATCTTCAGGAT  
CTGGTGGTTACCAATCACATCCTCCTACTCATTCTGGACAGTTCCGGCCAA  
ACTTGGTGGATGTCAAACCATTCGCCTGTCGGAGCACATTACACAGTTTG  
CCACGCTGGAGGTGATGCACTACTATGGCATTCTGTTGGAGGACTTCAAC  
AACAAACGGAGAGTTTGTCAATGACTGCATCTTCACCATGATGCATCACAT  
CGGTGGCGATCTGGGCCAGATTGGGGTTCTATTTCAACCAATTATTTTGA  
AAACCTATTCAAGAATTTGGGAAGCGGACTATGAACTGTGCGATGACTGG  
TCTGATCTTATCGAGTATGTGATTCACAAGTTCATGAATACTCCTCCGAA  
GTCGCCACTCACCATTCTTACAACCTCCTTGACGGAAATGACCAAGGAAC  
ACAACCAGGAGCATAACCGTTTGCTCTTGGTTCGAGGAGGAAATGGACACA  
CTTTATTGGTATTATGTGCAGAGCAAGAAGAACAACGATATTGTGGGAAA  
GATAGTTAAGCTCTTCAGCAACAACGGCAACAAGCTGAAAACCAGGATTT  
CTATTATCCAACAACCTTTTGCAACAAGACATTATCACCTGTTGGAATAC  
GATGACCTGATGAAGTTCGAGGATGCGGAGTATCAGAGAACTTTGCTGAC  
AACTCCCCTCCGCAACAACAGAGTCTGGAATTGAGATTAAGGAGTGCG  
CCTACGGCAAACCTCAGATGATGTTTCAAGATCCTGCTGGACCTGATCATT  
AAGGAAAACAAGGCGCAGCATTTGTTATGGCTGCAAAGGATCCTCATTGA  
GTGCTGCTTCGTTAAACTGACCCTGCGGAGTGGTCTCAAGGTTCCGGAAG  
GCGATCACATCATGGAGCCGGTGGCCTACCACTGCATCTGCAAGCAGAAG

|                                                  |                                                                                                                                                                                                                                                                                                                                                                                                                                                                                                                                                                                                                                                                                                                                                                                                                                                                                                                                                                                                                                                                                                                                                                                                                                                                                                                                                                                                                                                                                                                                                                                                                                                                                                                                                                                                                                                                                                                                               |
|--------------------------------------------------|-----------------------------------------------------------------------------------------------------------------------------------------------------------------------------------------------------------------------------------------------------------------------------------------------------------------------------------------------------------------------------------------------------------------------------------------------------------------------------------------------------------------------------------------------------------------------------------------------------------------------------------------------------------------------------------------------------------------------------------------------------------------------------------------------------------------------------------------------------------------------------------------------------------------------------------------------------------------------------------------------------------------------------------------------------------------------------------------------------------------------------------------------------------------------------------------------------------------------------------------------------------------------------------------------------------------------------------------------------------------------------------------------------------------------------------------------------------------------------------------------------------------------------------------------------------------------------------------------------------------------------------------------------------------------------------------------------------------------------------------------------------------------------------------------------------------------------------------------------------------------------------------------------------------------------------------------|
|                                                  | <p>TCCATTCCGGTGGTGCAGTGGAAACAACGAGCAATCCACTACGATGCTGTA<br/> CCAGCCTTTTGTTCCTGCTCCACAAGCTGGGCATTCAGCTGCCGGCGG<br/> ACGCGGGCTCGATCTTCGCCAGAATTCCGGACTACTGGACACCGGAGACA<br/> ATGTACGGACTCGCCAAAAGCTGGGACCGCTGGACAAACTCAACCTCAA<br/> GTTTCGACGCCAGTGAAGTGGAGGATGCGACGGCGTCGAGTCCGTTCGCGTT<br/> ACCACCACACCGGACCCCGCAACTCGCTCAGCTCGGTAAGCAGCCTGGAC<br/> GTGGATCTCGGCGATACCGAGGAGCTGGCCCTTATACCCGAGGTGGATGC<br/> GGCCGTGGAGAAGGCACACGCCATGGCATCCACGCCATCGCCAGCGAGA<br/> TTTTTCGCGGTTCCCAAGACGAAGCACTGCAACTCGATCATCAGATACACA<br/> CCAGATCCCACGCCTCCAGTGCCCAACTGGCTGCAGTTGGTCATGCGCAG<br/> CAAATGCAATCATCGCACAGGTCCGTCTGGTGATCCCAGCGATTGCATTG<br/> GCTCCTCGTCGACAACCGTGGACGATGAGGGATTTGGCAAGTCCATCAGT<br/> GCAGCCACTTCGCAGGCGGCGAGCACCTCCATGAGCACGGTTAATCCAC<br/> AACCACCTTGAGCCTGAACATGCTAAACACCTTCATGGGAAGCCACAACG<br/> AGAACAGCAGCAGTTCTGGTTGCGGGGGCACCGTCTCCTCCCTGTCCATG<br/> GTGGCTCTGATGAGCACCGGCGCGGCAGGCGGAGGAGTAACACCTCCGG<br/> GCTGGAAATGGATGTGGACGCCTCCATGAAGTCCTCGTTCGAGCGGCTGG<br/> AGGTAAACGGATCGCACTTCTCGCGGGCCAACAACCTGGACCAGGAGTAC<br/> AGTGCCATGGTGGCATCTGTGTACGAAAAGGAGAAGGAATTAACAGCGA<br/> CAATGTCTCTTTGGCCTCGGACCTGACCAGAATGTATGTGAGCGATGAGG<br/> ACGATCGACTTGAGCGAACCAGATCCGGGTGCCCACTATCACCTCGAG<br/> GGTGGCTCAGGAATGGACAAAGACTGCGAAATGAAGCGCACCACCTGGA<br/> TAGCCCTCTGGGCAAGCTGGAAGTGTCTGGGTGCGAACAGGGCCTGCACC<br/> GTATCATCTTCTGGGCAAAGGAACATCTGCCGCCGACGCCGTGGAAGTG<br/> CCTGCCCCAGCCGCCGTGCTGGGCGGACCAGAGCCACTGATGCAGGCCAC<br/> CGCCTGGCTCAACGCCTACTTTCACCAGCCTGAGGCCATCGAGGAGTTCC<br/> CTGTGCCAGCCCTGCACCACCCAGTGTTCCAGCAGGAGAGCTTTACCCGC<br/> CAGGTGCTGTGGAAACTGCTGAAAGTGGTGAAGTTCGGAGAGGTCATCAG<br/> CTACAGCCACCTGGCCGCCCTGGCCGGCAATCCCGCCGCCACCGCCGCCG<br/> TGAAAACCGCCCTGAGCGGAAATCCCGTGCCATTCTGATCCCCTGCCAC<br/> CGGGTGGTGCAGGGCGACCTGGACGTGGGGGGCTACGAGGGCGGGCTCGC<br/> CGTGAAAGAGTGGCTGCTGGCCACGAGGGCCACAGACTGGGCAAGCCTG<br/> GGCTGGGTGGGGCGGGTACCATA CGATGTTCCAGATTACGCTCGTACC<br/> GGTCATCATCACCATCACCATTGA</p> |
| <p>CLIP-CRY-<br/> SNAP in<br/> pAC5.1 vector</p> | <p>ATGGAGCAGAAGCTGATCTCAGAGGAGGACCTGGGAGGAGGAGAACAAAA<br/> ATTAATAAGTGAAGAAGACCTGGGCGGCGGCGAGCAGAAGCTGATCTCAG<br/> AGGAGGACCTGGGAGGAGGAATGGACAAAGACTGCGAAATGAAGCGCACC<br/> ACCCTGGATAGCCCTCTGGGCAAGCTGGAAGTGTCTGGGTGCGAACAGGG<br/> CCTGCACCGTATCATCTTCTGGGCAAAGGAACATCTGCCGCCGACGCCG<br/> TGGAAGTGCTGCCCCAGCCGCCGTGCTGGGCGGACCAGAGCCACTGATC<br/> CAGGCCACCGCCTGGCTCAACGCCTACTTTCACCAGCCTGAGGCCATCGA<br/> GGAGTCCCTGTGCCAGCCCTGCACCACCCAGTGTTCCAGCAGGAGAGCT<br/> TTACCCGCCAGGTGCTGTGGAAACTGCTGAAAGTGGTGAAGTTCGGAGAG<br/> GTCATCAGCGAGAGCCACCTGGCCGCCCTGGTGGGCAATCCCGCCGCCAC<br/> CGCCGCCGTGAACACCGCCCTGGACGGAAATCCCGTGCCATTCTGATCC<br/> CCTGCCACCGGTGGTGCAGGGCGACAGCGACGTGGGGCCCTACCTGGGC<br/> GGGCTCGCCGTGAAAGAGTGGCTGCTGGCCACGAGGGCCACAGACTGGG<br/> CAAGCCTGGGCTGGGTGGTGGCTCAGGAATGGCCACGCGAGGGGCGAATG</p>                                                                                                                                                                                                                                                                                                                                                                                                                                                                                                                                                                                                                                                                                                                                                                                                                                                                                                                                                                                                                                                                                                                                   |

|                                                           |                                                                                                                                                                                                                                                                                                                                                                                                                                                                                                                                                                                                                                                                                                                                                                                                                                                                                                                                                                                                                                                                                                                                                                                                                                                                                                                                                                                                                                                                                                                                                                                                                                                                                                                                                                                                                                                                                                                                                                                                                                                                                                                                                                                                                                                                                                                                                                                                                                                                                                                                                        |
|-----------------------------------------------------------|--------------------------------------------------------------------------------------------------------------------------------------------------------------------------------------------------------------------------------------------------------------------------------------------------------------------------------------------------------------------------------------------------------------------------------------------------------------------------------------------------------------------------------------------------------------------------------------------------------------------------------------------------------------------------------------------------------------------------------------------------------------------------------------------------------------------------------------------------------------------------------------------------------------------------------------------------------------------------------------------------------------------------------------------------------------------------------------------------------------------------------------------------------------------------------------------------------------------------------------------------------------------------------------------------------------------------------------------------------------------------------------------------------------------------------------------------------------------------------------------------------------------------------------------------------------------------------------------------------------------------------------------------------------------------------------------------------------------------------------------------------------------------------------------------------------------------------------------------------------------------------------------------------------------------------------------------------------------------------------------------------------------------------------------------------------------------------------------------------------------------------------------------------------------------------------------------------------------------------------------------------------------------------------------------------------------------------------------------------------------------------------------------------------------------------------------------------------------------------------------------------------------------------------------------------|
|                                                           | <p> TGATTTGGTTTCGCCATGGATTGCGCCTCCATGATAATCCCGCTCTATTG<br/> GCCGCCCTCGCCGATAAGGATCAGGGTATAGCCCTAATTCCCGTTTTTCAT<br/> ATTTCGATGGAGAGAGTGCAGGTACCAAGAATGTGGGTTACAATCGGATGC<br/> GTTTCCTCCTGGACTCGTTGCAGGACATCGATGATCAGCTACAGGCGGCA<br/> ACTGATGGACGTGGACGCCTCCTGGTCTTCGAGGGCGAACCGGCTTATAT<br/> CTTCCGCCGGCTACATGAGCAAGTGCCTGTCACAGGATTTGCATAGAGC<br/> AGGACTGCGAGCCAATTTGGAATGAGCGCGATGAAAGCATCCGTTCTCTA<br/> TGTCGGGAGCTGAATATCGACTTTGTGCGAGAAGGTATCACACACGCTTTG<br/> GGATCCGCAATTGGTGATTGAGACCAATGGTGGCATTCCACCGCTGACCT<br/> ACCAAATGTTCTGCACACGGTGCAAATTATTGGGCTTCCACCGGTCCC<br/> ACCGCCGATGCTCGACTAGAAGACGCCACCTTTGTGCGAGCTGGACCCCGA<br/> GTTCTGCCGAAGTCTTAAGTTGTTGAGCAGCTGCCACGCCGGAGCACT<br/> TCAATGTGTATGGAGACAACATGGGCTTCTGGCCAAGATTAAGTGGCGC<br/> GGCGGAGAAACACAGGCCTTACTTCTGTTGGATGAGCGTCTTAAAGTGGA<br/> GCAGCATGCGTTTGAGCGTGGATTTTATCTGCCCAACCAGGCACTGCCCA<br/> ATATCCACGACTCGCCAAAATCGATGAGCGCCCATCTGCGCTTTGGTTGC<br/> CTTTCGGTACGTCGCTTCTACTGGAGCGTCCACGATCTCTTCAAGAATGT<br/> CCAGTTGCGCGCCTGTGTGCGGGGCGTTCAGATGACTGGCGGCGCGCACA<br/> TCACGGGACAGTTGATCTGGCGAGAGTACTTCTACACCATGTCGGTGAAC<br/> AATCCAAACTACGATCGCATGGAGGGCAATGACATCTGCCTGAGCATCCC<br/> GTGGGCTAAGCCGAACGAAAATCTCCTGCAGAGCTGGCGTTTAGGCCAAA<br/> CGGGATTCCCGCTCATCGACGGCGCCATGCGACAACCTCTGGCCGAGGGA<br/> TGGCTCCACCATACGCTGCGCAACACCGTGGCCACCTTTCTCACGCGCGG<br/> CGGTTTGTGGCAGAGCTGGGAGCATGGACTGCAGCACTTTCTGAAGTATC<br/> TGCTGGATGCGGATTGGTCCGTCTGCGCTGGCAACTGGATGTGGGTATCC<br/> AGCTCGGCGTTTGAAAGGCTGCTGGACTCCTCCCTGGTACCTGCCCGGT<br/> GGCATTGGCCAAGCGACTTGATCCGGATGGCACCTACATCAAGCAGTACG<br/> TCCCGGAGTTGATGAATGTGCCAAGGAATTTGTTACAGAGCCCTGGCGA<br/> ATGTCTGCCGAGCAGCAGGAGCAGTACGAGTGCCTGATCGGAGTCCATTA<br/> TCCGGAGCGGATCATTGATTTGTCCATGGCCGTAAGCGAAAACATGCTGG<br/> CCATGAAGTCTCTCCGAAATTCGCTGATCACCCCGCCGCGCATTGCCGA<br/> CCATCCAACGAGGAGGAAGTGCCTCAGTTCTTCTGGCTGGCCGACCTCGA<br/> GGGTGGCTCAGGAATGGACAAAGACTGCGAAATGAAGCGCACCACCCTGG<br/> ATAGCCCTCTGGGCAAGCTGGAAGTGTCTGGGTGCGAACAGGGCCTGCAC<br/> CGTATCATCTTCTGGGCAAAGGAACATCTGCCGCCGACGCCGTGGAAGT<br/> GCCTGCCCCAGCCGCCGTGCTGGGCGGACCAGAGCCACTGATGCAGGCCA<br/> CCGCCTGGCTCAACGCCTACTTTACCAGCCTGAGGCCATCGAGGAGTTC<br/> CCTGTGCCAGCCCTGCACCACCCAGTGTTCAGCAGGAGAGCTTTACCCG<br/> CCAGGTGCTGTGGAAACTGCTGAAAGTGGTGAAGTTCGGAGAGGTCATCA<br/> GCTACAGCCACCTGGCCGCCCTGGCCGGCAATCCCGCCGCCACCGCCGCC<br/> GTGAAAACCGCCCTGAGCGGAAATCCCGTGCCATTCTGATCCCCTGCCA<br/> CCGGGTGGTGCAGGGCGACCTGGACGTGGGGGGCTACGAGGGCGGGCTCG<br/> CCGTGAAAGAGTGGCTGCTGGCCACGAGGGCCACAGACTGGGCAAGCCT<br/> GGGCTGGGTGGGGCGGGTACCCATACGATGTTCCAGATTACGCTTAA </p> |
| Twin strep-<br>TEV-CRY-<br>Sortase tag in<br>pET28 vector | <p> ATGGGCAGCAGCTGGAGCCATCCGCAGTTTGAAAAAGGTGGTGGTAGCGG<br/> TGGTGGTTCAGGTGGTAGTGCATGGAGCCACCCGCAGTTCGAAAAAGGAG<br/> GAGAAAACCTGTACTTCCAATCCGGAGGACATATGATGGCCACGCGAGGG<br/> GCCAATGTGATTTGGTTTCGCCATGGATTGCGCCTCCATGATAATCCCGC </p>                                                                                                                                                                                                                                                                                                                                                                                                                                                                                                                                                                                                                                                                                                                                                                                                                                                                                                                                                                                                                                                                                                                                                                                                                                                                                                                                                                                                                                                                                                                                                                                                                                                                                                                                                                                                                                                                                                                                                                                                                                                                                                                                                                                                                                                                                                                    |



TCTATTGGCCGCCCTCGCCGATAAGGATCAGGGTATAGCCCTAATTCCCG  
TTTTTCATATTCGATGGAGAGAGTGCAGGTACCAAGAATGTGGGTTACAAT  
CGGATGCGTTTCTCCTGGACTCGTTGCAGGACATCGATGATCAGCTACA  
GGCGGCAACTGATGGACGTGGACGCCTCCTGGTCTTCGAGGGCGAACCGG  
CTTATATCTTCCGCCGGCTACATGAGCAAGTGCCTGTCACAGGATTTGC  
ATAGAGCAGGACTGCGAGCCAATTTGGAATGAGCGCGATGAAAGCATCCG  
TTCTCTATGTCGGGAGCTGAATATCGACTTTGTGCGAGAAGGTATCACACA  
CGCTTTGGGATCCGCAATTGGTGATTGAGACCAATGGTGGCATTCCACCG  
CTGACCTACCAATGTTCTGCACACGGTGCAAATTATTGGGCTTCACC  
GCGTCCCACCGCCGATGCTCGACTAGAAGACGCCACCTTTGTGAGCTGG  
ACCCCGAGTTCTGCCGAAGTCTTAAGTTGTTGAGCAGCTGCCACGCCG  
GAGCACTTCAATGTGTATGGAGACAACATGGGCTTCCTGGCCAAGATTAA  
CTGGCGCGGCGGAGAAACACAGGCCTTACTTCTGTTGGATGAGCGTCTTA  
AAGTGGAGCAGCATGCGTTTGAGCGTGGATTTTATCTGCCCAACCAGGCA  
CTGCCAATATCCACGACTCGCCAAAATCGATGAGCGCCATCTGCGCTT  
TGTTGCTTTTCGGTACGTGCTTCTACTGGAGCGTCCACGATCTCTTCA  
AGAATGTCCAGTTGCGCGCCTGTGTGCGGGGCGTTCAGATGACTGGCGGC  
GCGCACATCACGGGACAGTTGATCTGGCGAGAGTACTTCTACACCATGTC  
GGTGAACAATCCAACTACGATCGCATGGAGGGCAATGACATCTGCCTGA  
GCATCCCGTGGGCTAAGCCGAACGAAAATCTCCTGCAGAGCTGGCGTTTA  
GGCAAACGGGATTCCCGCTCATCGACGGCGCCATGCGACAACCTCCTGGC  
CGAGGGATGGCTCCACCATACGCTGCGCAACACCGTGGCCACCTTTCTCA  
CGCGCGGCGGTTTGTGGCAGAGCTGGGAGCATGGACTGCAGCACTTTCTG  
AAGTATCTGCTGGATGCGGATTTGGTCGGTCTGCGCTGGCAACTGGATGTG  
GGTATCCAGCTCGGCGTTTGAAGGCTGCTGGACTCCTCCCTGGTCACCT  
GCCCGTGGCATTGGCCAAGCGACTTGATCCGGATGGCACCTACATCAAG  
CAGTACGTCCCGGAGTTGATGAATGTGCCCAAGGAATTTGTTACAGAGCC  
CTGGCGAATGTCTGCCGAGCAGCAGGAGCAGTACGAGTGCCTGATCGGAG  
TCCATTATCCGGAGCGGATCATTGATTTGTCCATGGCCGTAAAGCGAAAC  
ATGCTGGCCATGAAGTCTCTCCGAAATTCGCTGATCACCCCGCCGCCGA  
TTGCCGACCATCCAACGAGGAGGAAGTGCCTCAGTTCTTCTGGCTGGCCG  
ACCTGCCGGGTACGGGCTAA

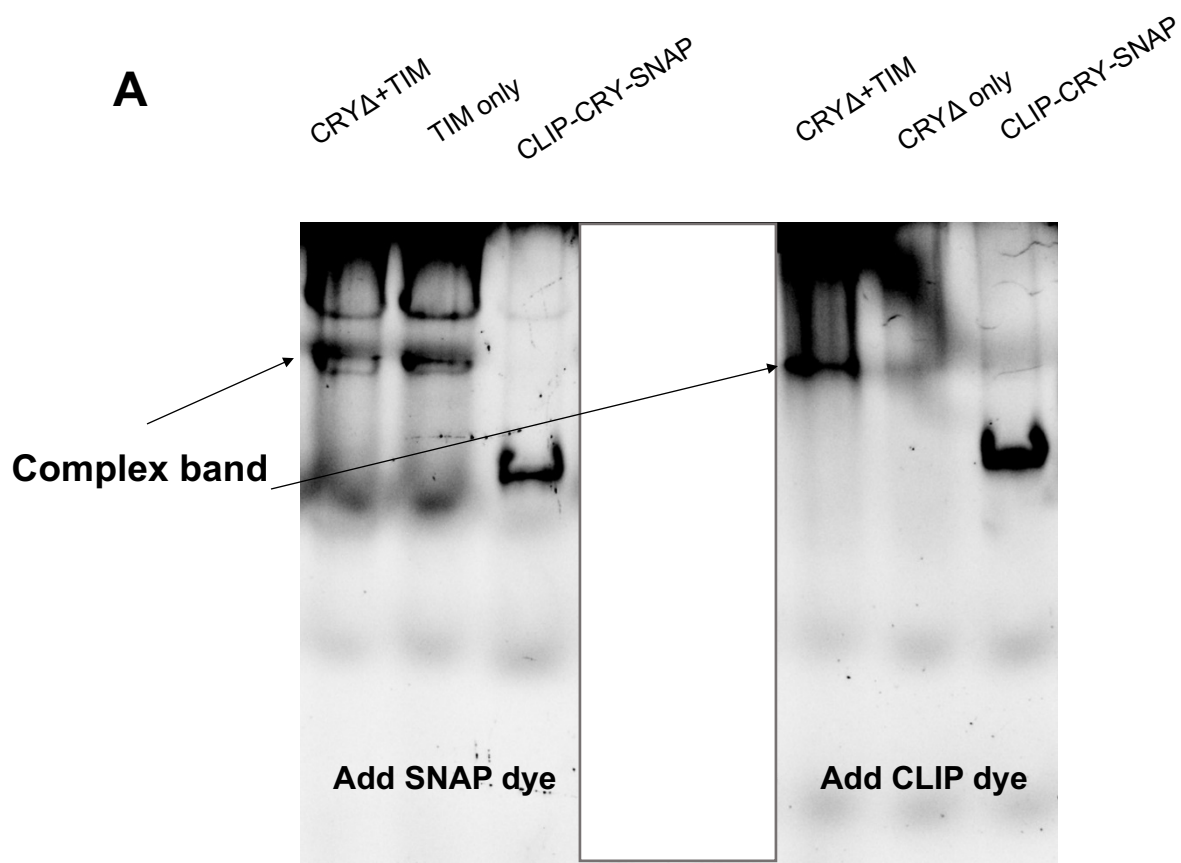

**B**

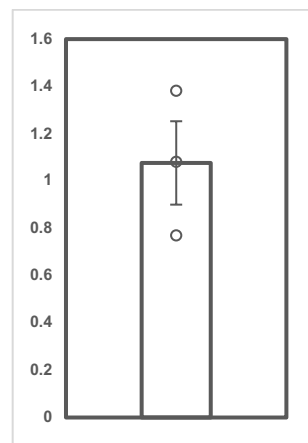

**TIM/CRY $\Delta$  molar ratio**

**Figure S2:** Stoichiometry of CRY binding to TIM, Related to Figure 2. (A) Representative Clear-Native (CN)-PAGE gel of purified CLIP-CRY:TIM-SNAP complexes after dye addition and labeling. Fluorescence detected and imaged by a ChemiDoc (BioRad). Samples on the left were only labeled with SNAP dye and samples on the right were labeled with CLIP dye. Known amount of a CLIP-CRY-SNAP fusion provides the standard for normalization. (B) Quantification of the normalized TIM and CRY $\Delta$  fluorescent signal. Error bars represent the SEM for  $n = 3$ .

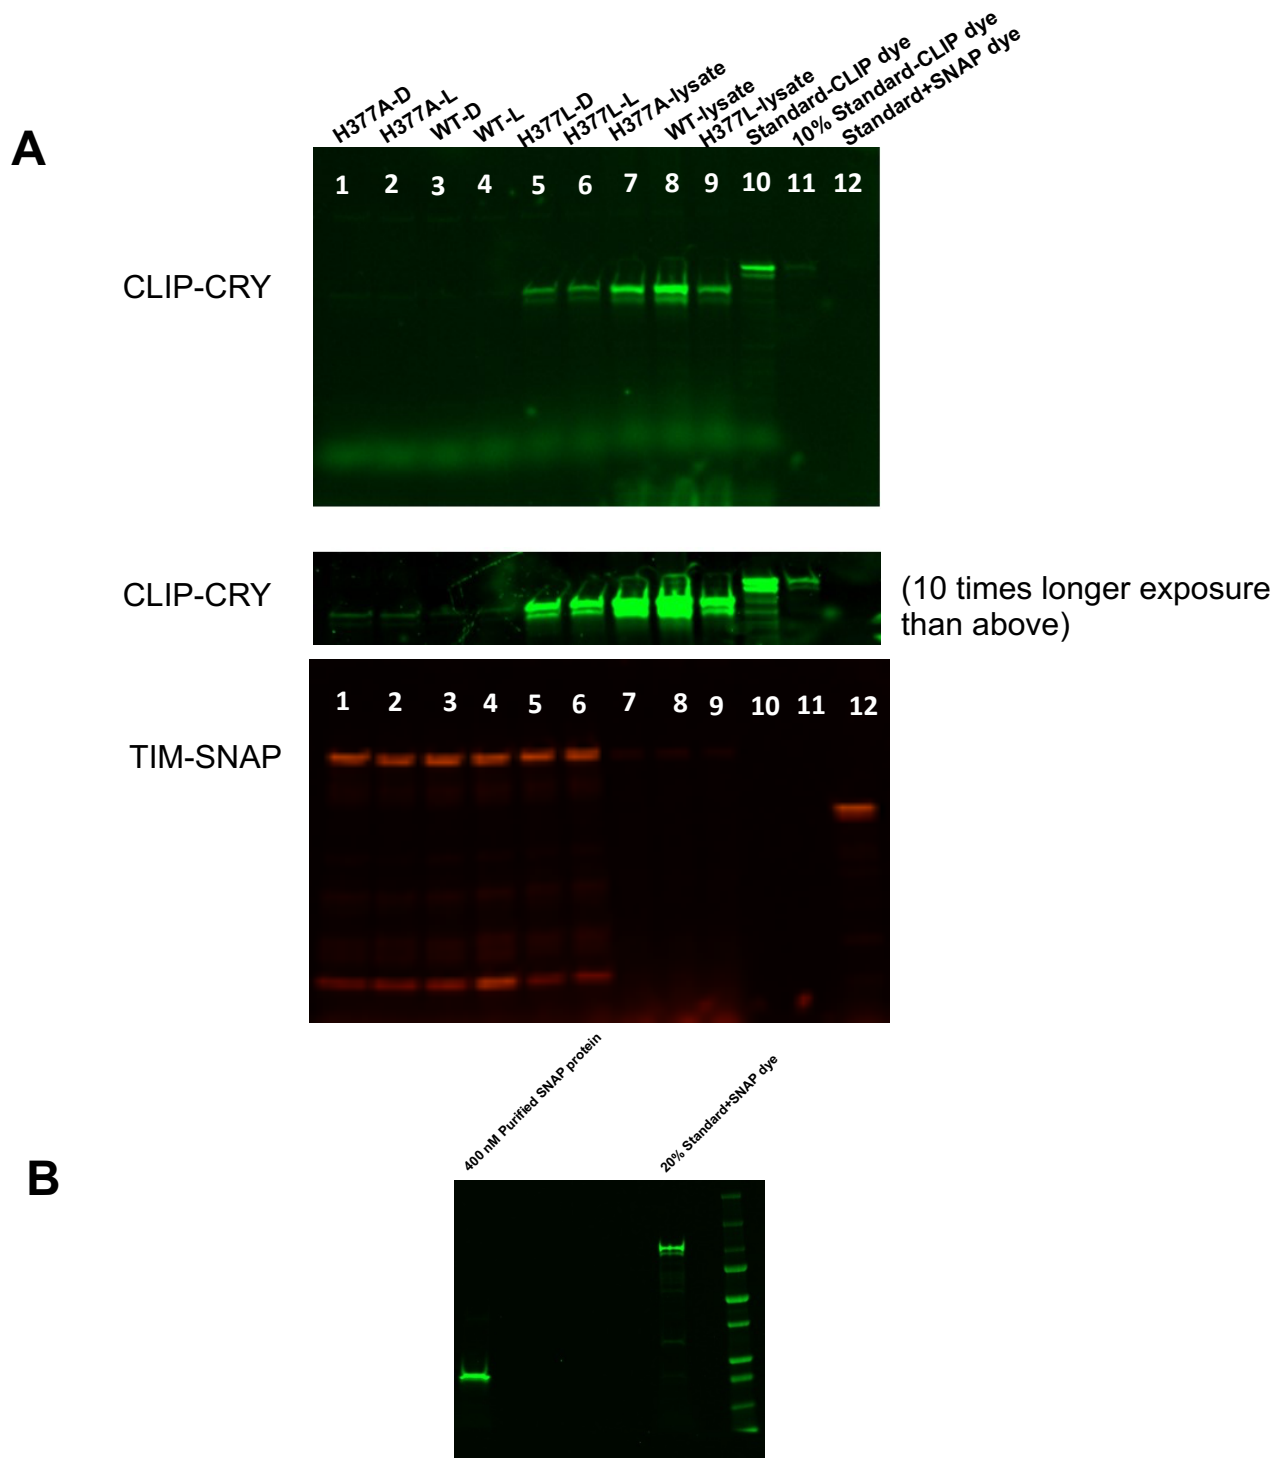

**Figure S3:** Multiplex imaging of TIM and CRY bands, Related to Figures 2 and 3. (A) Lane 1-6 show TIM and CRY SWFTI signals on HA resin, whereas lane 7-9 show the signals in lysate samples. Lane 10-12 exhibit fluorescent signals from the internal standard CLIP-CRY-SNAP. To prevent fluorescence crosstalk, Lane 10 and 11 have the standard only mixed with CLIP dye, whereas lane 12 contains the standard with only SNAP dye. In lane 11 the standard was diluted to 10%. (B) The quantification of standard by purified SNAP proteins. The standard was diluted to 20% and mixed with SNAP dye.

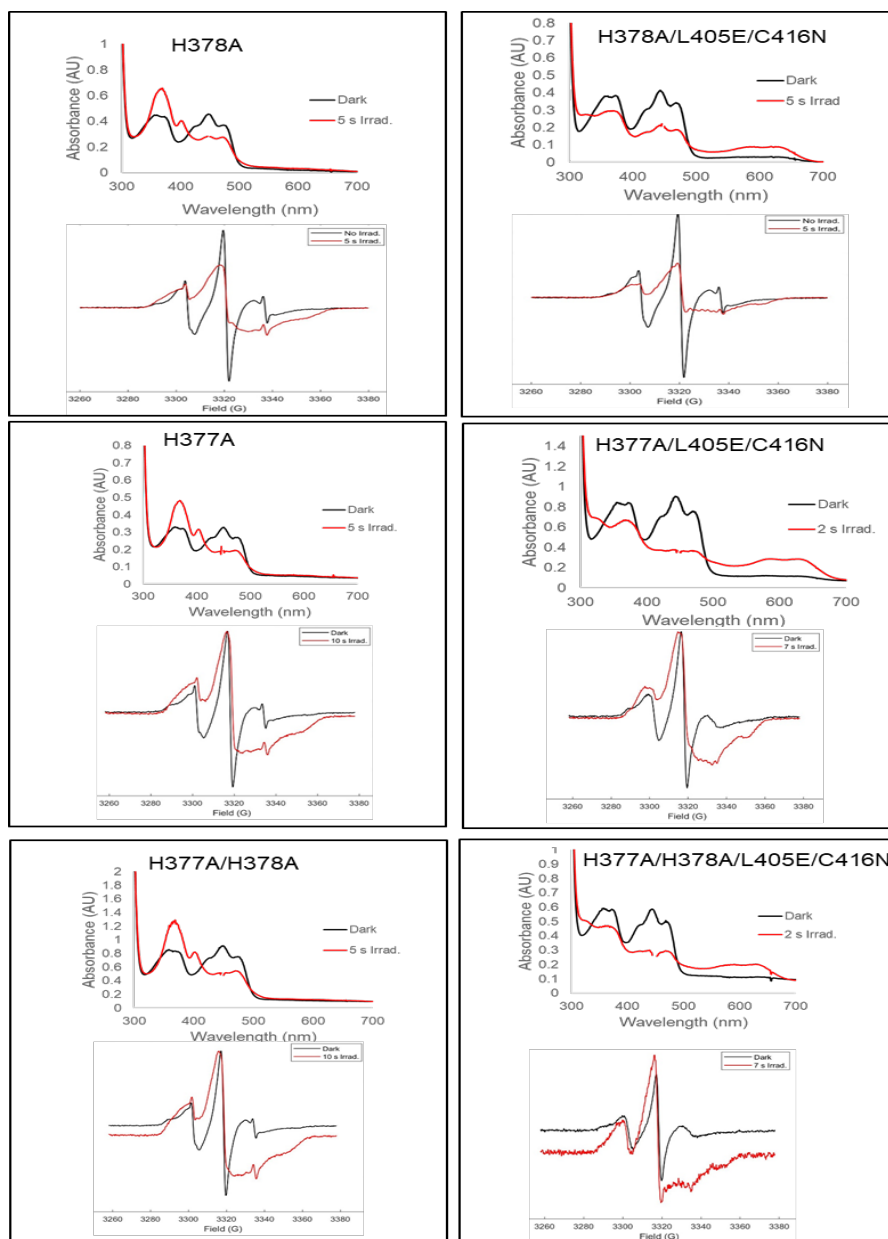

**Figure S4:** Spectroscopy of CRY variants, Related to Figure 4. UV-Vis and cw-ESR spectra of His377 and His378 alanine variants in the dark and after 2-5 sec of blue light exposure at 440 nm. The left column are all variants in the WT background, while the right column is those in the L405E/C416N background. In UV-Vis (top half of each panel), all WT background variants produce the ASQ with a characteristic absorbance at 364 and 403 nm, while the L405E/C416N background variants produce the NSQ (broadband feature ~550-650 nm). Gaps in spectra are at the excitation laser wavelength; Time of irradiation for full reduction varies between 2-5 second depending on laser alignment with respect to the cuvette. cwESR (bottom half of each panel) spectra of all dCRY variants labeled at the C-terminus with a nitroxide label. All spectra were recorded at X-band in deuterated buffer. Broadened features in light-state spectra reflect overlapping flavin and nitroxide features.

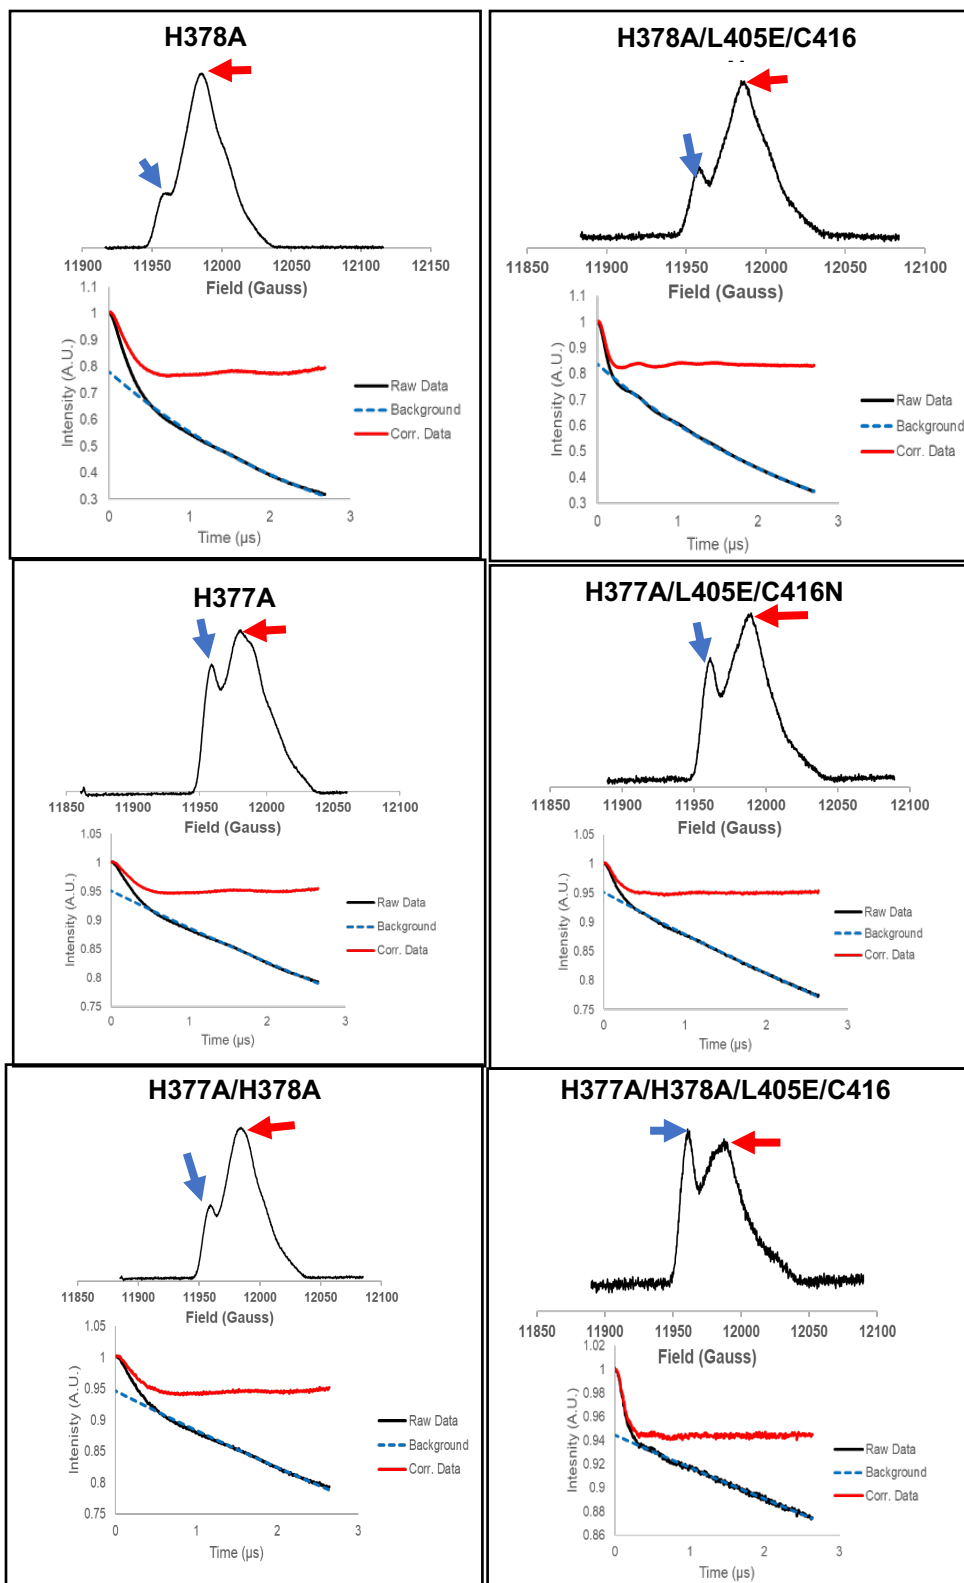

**Figure S5:** Representative field swept echoes (FSE), primary DEER traces, background subtractions, and corrected signals of H377/H378 variants after light irradiation at Q-band, Related to Figure 4. Probe (nitroxide) and pump (flavin) pulses are marked by arrows blue and red arrows, respectively, and are separated by 84 MHz ( $\sim 30\text{G}$ ).

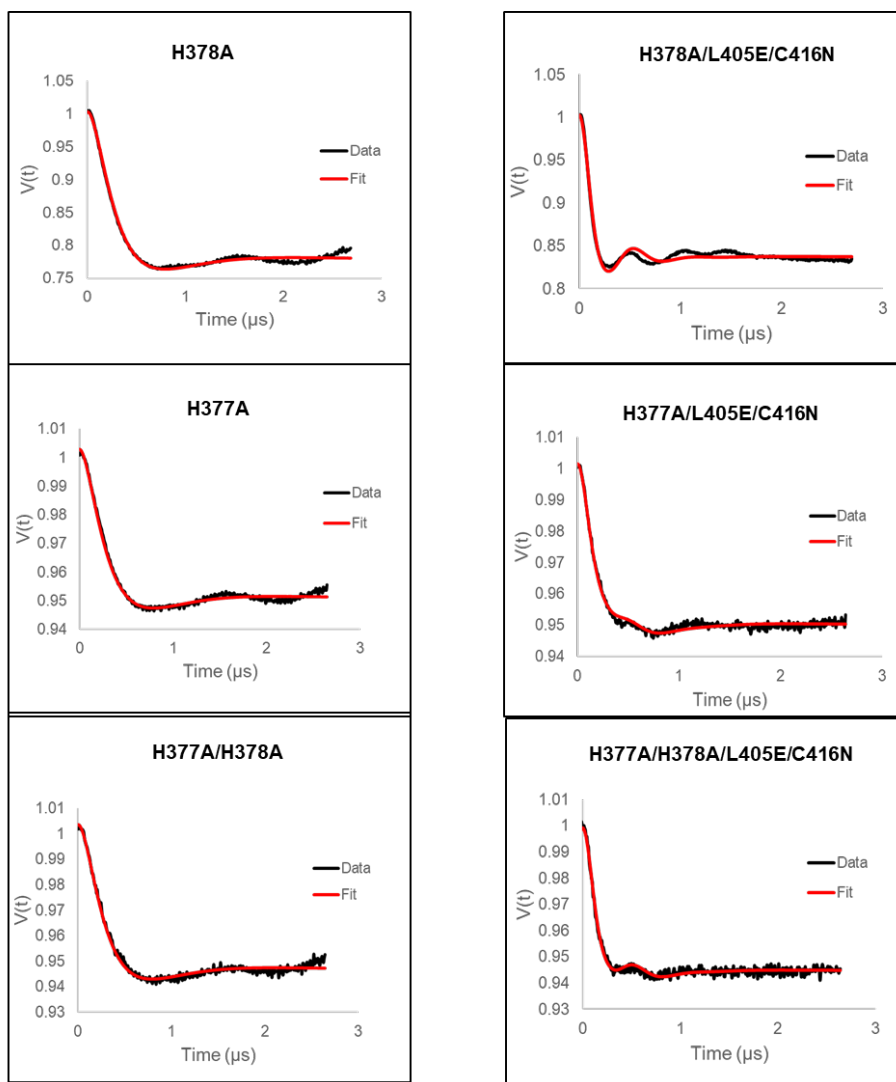

**Figure S6:** Time domain traces of all alanine variants and their respective fits carried out based on a restrained two-state model previously established with DD, Related to Figure 4. All ASQ forming variants (left) were fit with one component, while all NSQ forming variants (right) were fit using two components. Fittings were carried out as detailed in the **Methods**.

**Table S2:** Details of restrained DD fittings, Related to Table 1 and Figure 4.

| Variant                 | % Undocked        | $\chi_v^2$ (error in fit) |
|-------------------------|-------------------|---------------------------|
| H377A                   | 100*              | 3.1**                     |
| H378A                   | 100*              | 7.1**                     |
| H377A/H378A             | 100*              | 1.4                       |
| H377A/L405E/C416N       | $63 \pm 1$        | 1.4                       |
|                         | $49 \pm 13$       | 1.1                       |
|                         | $58 \pm 5^{***}$  | 1.0                       |
| H378A/L405E/C416N       | $17 \pm 0.3$      | 24.**                     |
|                         | $32 \pm 6$        | 1.0                       |
|                         | $29 \pm 4^{***}$  | 0.9                       |
| H377A/H378A/L405E/C416N | $42 \pm 2$        | 1.0                       |
|                         | $54 \pm 30$       | 1.4                       |
|                         | $39 \pm 17^{***}$ | 1.0                       |

**Table S2:** Distance distributions obtained from one and two gaussian fittings of time domains by DD. Residual error  $\chi_v^2$  values are determined by DD and indicate the robustness of the fit to the data. The  $\langle R \rangle, \sigma$  with the short component listed first, and long component listed second. H377A, H378A, and H377A/H378A are all WT-like and were fit best using only the undocked component (\*). The relatively high error (\*\*) reflects the small amplitude and broad features of this component. Samples measured at pH 7 are indicated by (\*\*\*).

**Table S3:** Percent undocked state for Ala variants using linear combination fit, Related to Figure 4.

| Variant                 | % Undocked     |
|-------------------------|----------------|
| H377A                   | 100            |
| H378A                   | 100            |
| H377A/H378A             | 100            |
| H377A/L405E/C416N       | $50 \pm 5^*$   |
| H378A/L405E/C416N       | $16 \pm 1.3^*$ |
| H377A/H378A/L405E/C416N | $36 \pm 6^*$   |

**Table S3:** Values determined by fitting the time domain traces of the H377A/H378A variants with a linear combination of the time domain traces of the WT & EN variant (described in the methods section). Uncertainty values obtained for n = 3 samples (\*).

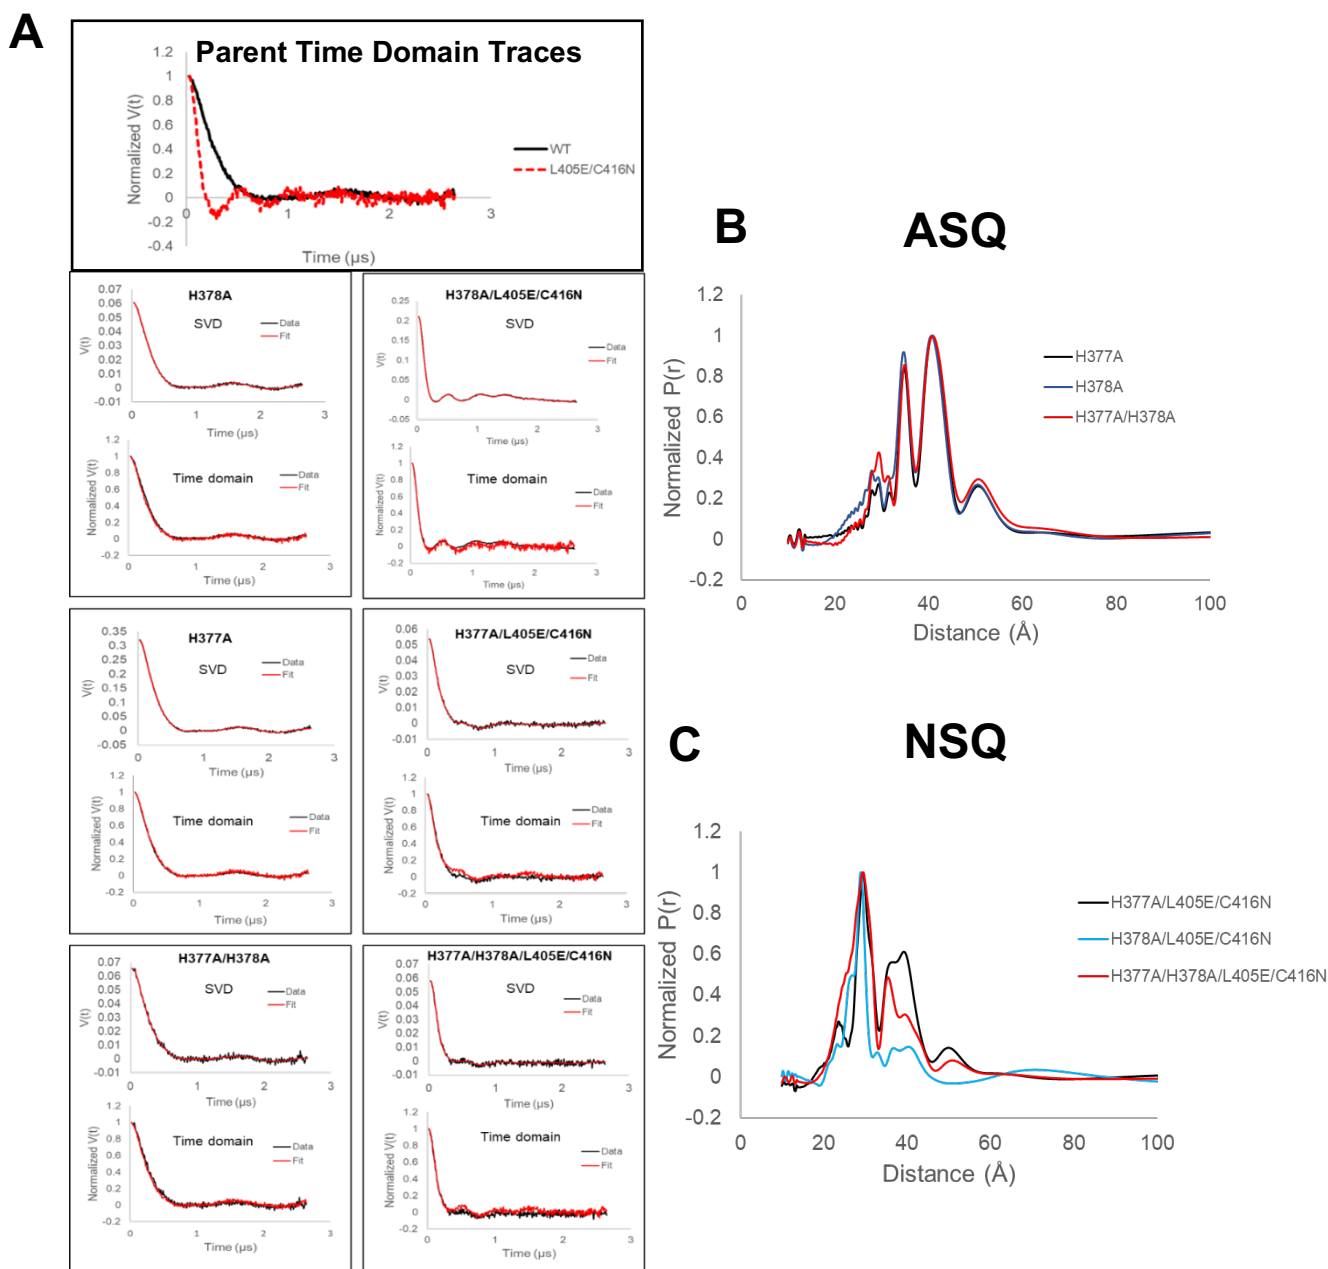

**Figure S7:** Analysis of alanine variant DEER data with the SVD and time-domain methods, Related to Figure 4. **(A)** Parent time trace components shown at top, followed by fits to experimental data to provide the component weights of Table S2. **(B and C)** Distance distributions obtained using the SVD method for all the alanine variants. The SVD fits qualitatively agrees with the DD and linear combination fits. The ASQ (WT background) forming variants **(B)** have larger distance peaks at  $\sim 35\text{-}45$   $\text{\AA}$  corresponding to the undocked state. whereas the NSQ (EN background) forming variants **(C)** have peaks at both  $\sim 25\text{-}30$   $\text{\AA}$  and  $35\text{-}45$   $\text{\AA}$ , thereby indicating a mixture of the docked and undocked states.



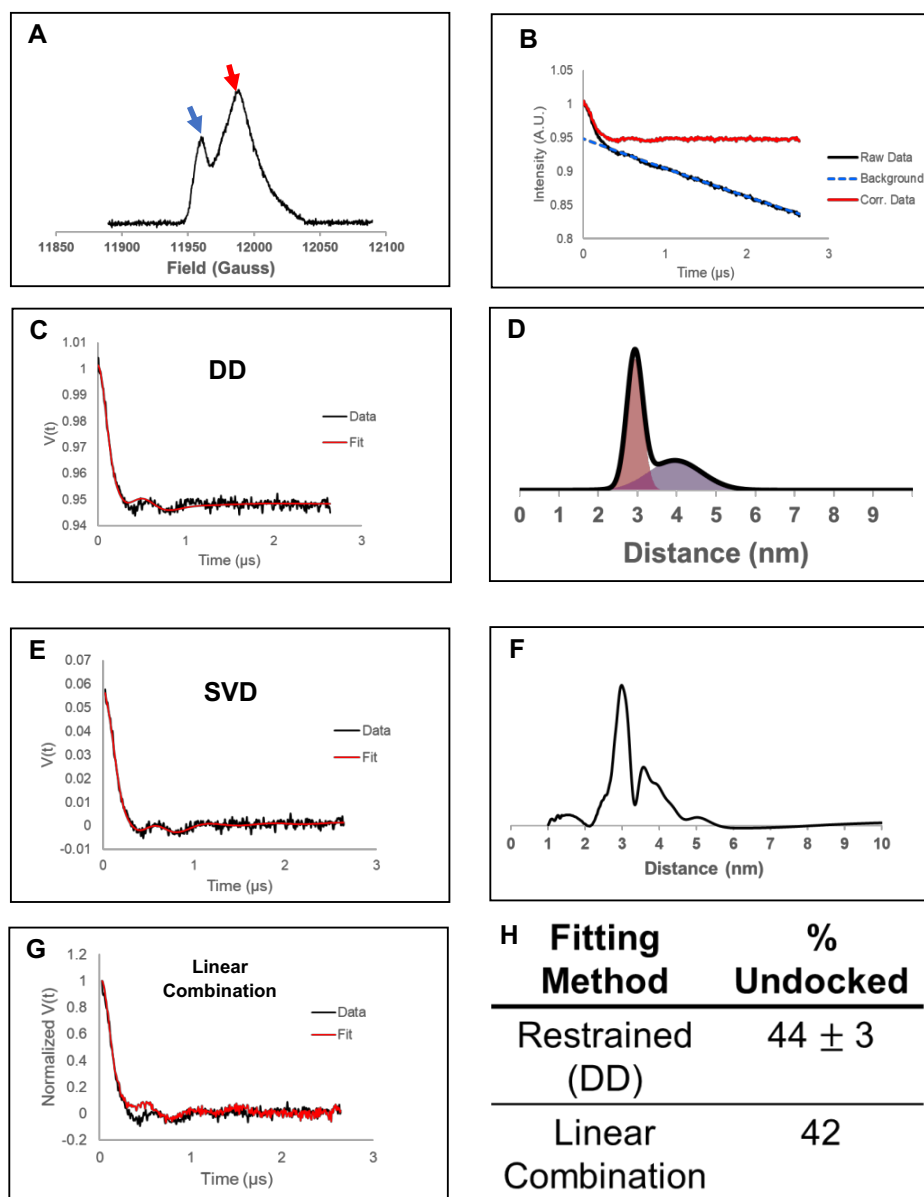

**Figure S8:** H377L/L405E/C416N DEER data, Related to Figure 4. **(A)** Field swept echo with probe and pump pulses marked with blue and red arrows, respectively. **(B)** Primary DEER trace along with background subtracted data, and corrected signals obtained from DD. **(C)** Time domain fitting using restrained two component fit ( $\langle R \rangle, \sigma$  the docked and undocked states are (29.3, 2.0 Å) and (39.5, 6.8 Å), respectively;  $\chi^2=0.4$ ). **(D)** Distance distribution calculated by DD, corresponding to 44 ± 3% undocked. **(E)** Time domain fitting using the SVD method. **(F)** Distance distribution calculated by SVD. **(G)** Linear combination of time domain fit, corresponding to 42% undocking. **(H)** Table summarizing results of undocking from quantifiable fitting methods.

**Table S4:** Gibson Assembly master mix, Related to Figures 2, 3 and 4.

|                                                  | Stock concentration<br>(U/ $\mu$ L) | Final<br>Concentration<br>(U/ $\mu$ L) | Volume ( $\mu$ L) |
|--------------------------------------------------|-------------------------------------|----------------------------------------|-------------------|
| Q5 reaction<br>buffer                            | 5 X                                 | 1.3 X                                  | 234               |
| Q5 DNA<br>polymerase                             | 2                                   | 0.033                                  | 14.8              |
| Taq DNA ligase                                   | 40                                  | 5.3                                    | 119.2             |
| T5 Exonuclease<br>(dilute with 1X<br>NEbuffer 4) | 0.5                                 | 0.005                                  | 9                 |
| PEG-8000                                         | 50%                                 | 6.7%                                   | 120.6             |
| NAD <sup>+</sup>                                 | 50 mM (33.2 mg/ml)                  | 1.3 mM                                 | 23.4              |
| dNTPs                                            | 2.5 mM                              | 0.27 mM                                | 97.2              |
| Water                                            |                                     |                                        | 282               |
|                                                  |                                     | Total                                  | 900               |

Reagents all purchased from New England Biolabs, except PEG-8000 (Cat# HR21-535, Hampton Research) and NAD<sup>+</sup> (Cat# 16077, Cayman Chemical).
